# Supplementary material for: Stress Responses and Ammonia Nitrogen Removal Efficiency of Oocystis lacustris in Saline Ammonium-Contaminated Wastewater Treatment
Source: MDPI journal article supplement (doi:10.3390/toxics12050353), 2024-05-10
Supplement: s1 [file s1]

**Supplementary Material for**

**Stress Responses and Ammonia Nitrogen Removal  
Efficiency of *Oocystis lacustris* in Saline  
Ammonium-Contaminated Wastewater Treatment**

Yuqi Zhu <sup>1</sup>, Yili Zhang <sup>1</sup>, Hui Chen <sup>2</sup>, Lisha Zhang <sup>1</sup> and Chensi Shen <sup>1,\*</sup>

<sup>1</sup> College of Environmental Science and Engineering, Donghua University, Shanghai 201620, China; 18017207003@163.com (Y.Z.); 17792797372@163.com (Y.Z.); ls Zhang@dhu.edu.cn (L.Z.)

<sup>2</sup> Key Laboratory of Agricultural Germplasm Resources Mining and Environmental Regulation of Ningbo City, College of Science and Technology, Ningbo University, Cixi 315302, China; chen hui07@126.com

\* Correspondence: shencs@dhu.edu.cn

## Figures

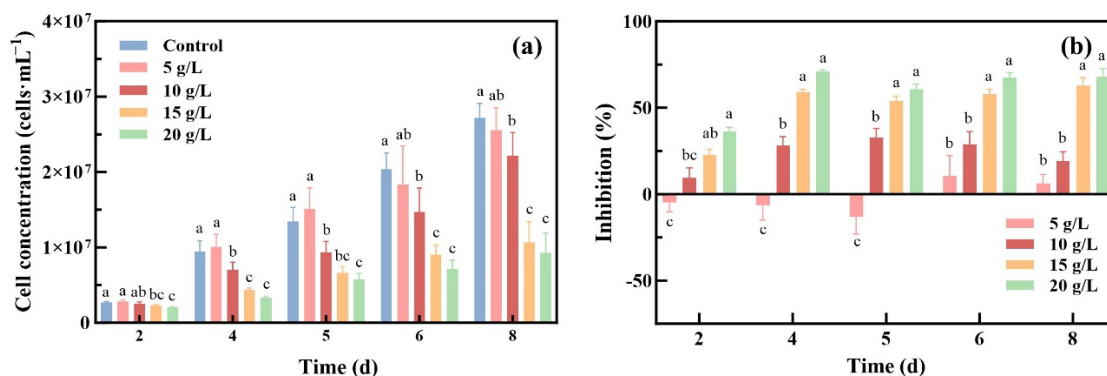

**Figure S1.** Growth of *Oocystis lacustris* at different  $\text{Na}_2\text{SO}_4$  concentrations - September 2022. (a) Cell concentration; (b) inhibition of yield. (At the same cultivation time, different letters on adjacent bars indicate significant differences ( $p < 0.05$ ), while the same letter indicates no significant difference.)

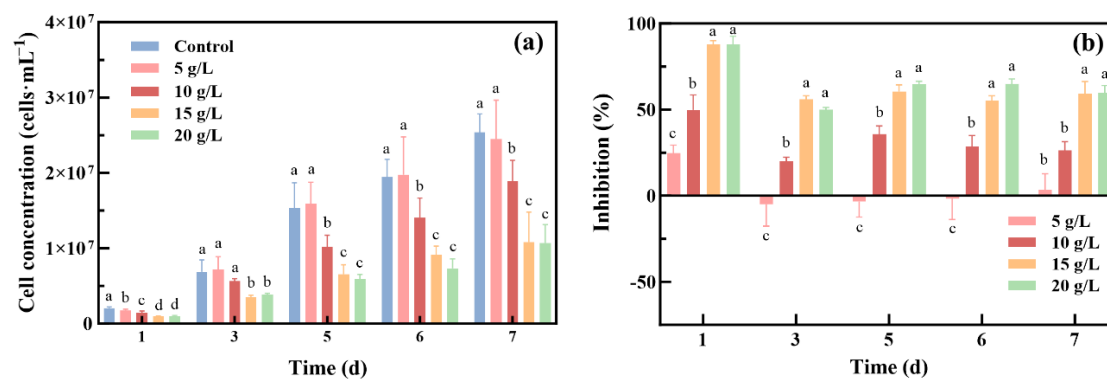

**Figure S2.** Growth of *Oocystis lacustris* at different  $\text{Na}_2\text{SO}_4$  concentrations - November 2022. (a) Cell concentration; (b) inhibition of yield. (At the same cultivation time, different letters on adjacent bars indicate significant differences ( $p < 0.05$ ), while the same letter indicates no significant difference.)

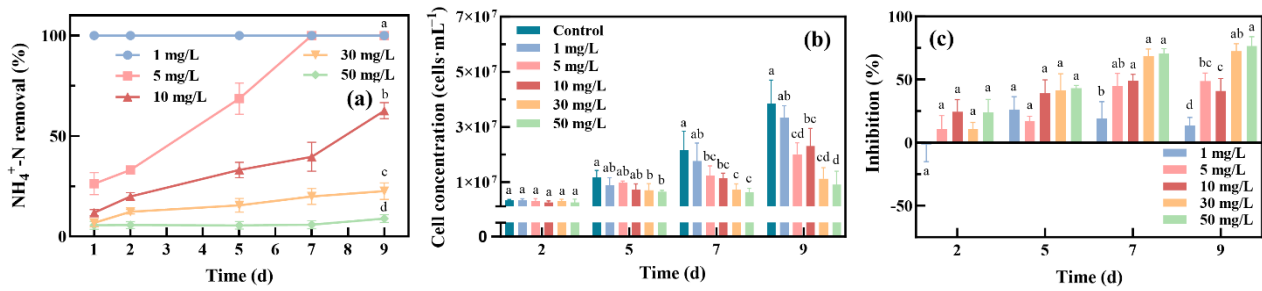

**Figure S3.** Treatment of *Oocystis lacustris* in the EX phase ( $8 \times 10^5$  cells/mL) with different concentrations of  $\text{NH}_4^+\text{-N}$  - September 2022. (a)  $\text{NH}_4^+\text{-N}$  removal rate; (b) cell concentration; (c) inhibition of yield. (At the same cultivation time, different letters on adjacent bars indicate significant differences ( $p < 0.05$ ), while the same letter indicates no significant difference.)

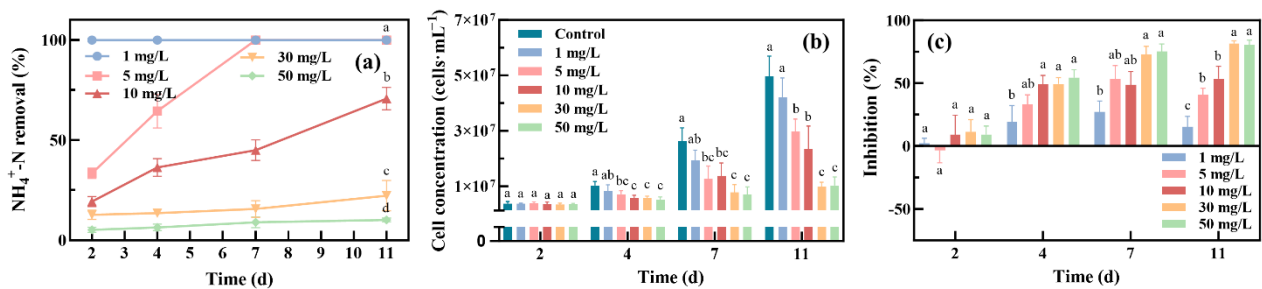

**Figure S4.** Treatment of *Oocystis lacustris* in the EX phase ( $8 \times 10^5$  cells/mL) with different concentrations of  $\text{NH}_4^+\text{-N}$  - November 2022. (a)  $\text{NH}_4^+\text{-N}$  removal rate; (b) cell concentration; (c) inhibition of yield. (At the same cultivation time, different letters on adjacent bars indicate significant differences ( $p < 0.05$ ), while the same letter indicates no significant difference.)

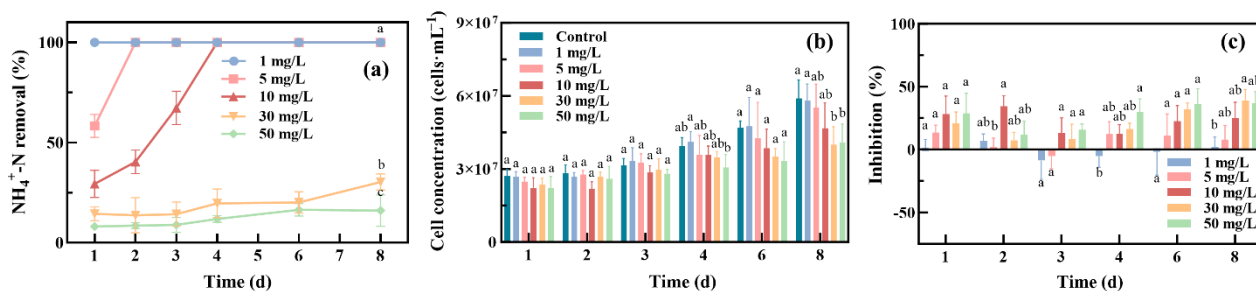

**Figure S5.** Treatment of *Oocystis lacustris* in the STA phase ( $2 \times 10^7$  cells/mL) with different concentrations of  $\text{NH}_4^+\text{-N}$  - September 2022. **(a)**  $\text{NH}_4^+\text{-N}$  removal rate; **(b)** cell concentration; **(c)** inhibition of yield. (At the same cultivation time, different letters on adjacent bars indicate significant differences ( $p < 0.05$ ), while the same letter indicates no significant difference.)

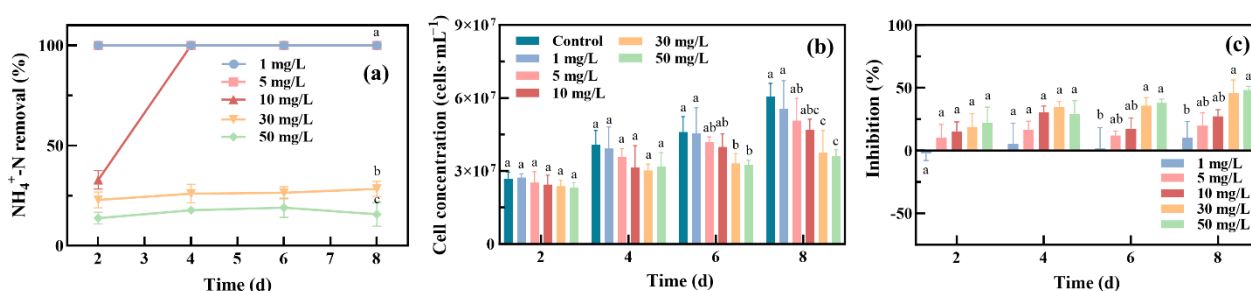

**Figure S6.** Treatment of *Oocystis lacustris* in the STA phase ( $2 \times 10^7$  cells/mL) with different concentrations of  $\text{NH}_4^+\text{-N}$  - November 2022. **(a)**  $\text{NH}_4^+\text{-N}$  removal rate; **(b)** cell concentration; **(c)** inhibition of yield. (At the same cultivation time, different letters on adjacent bars indicate significant differences ( $p < 0.05$ ), while the same letter indicates no significant difference.)

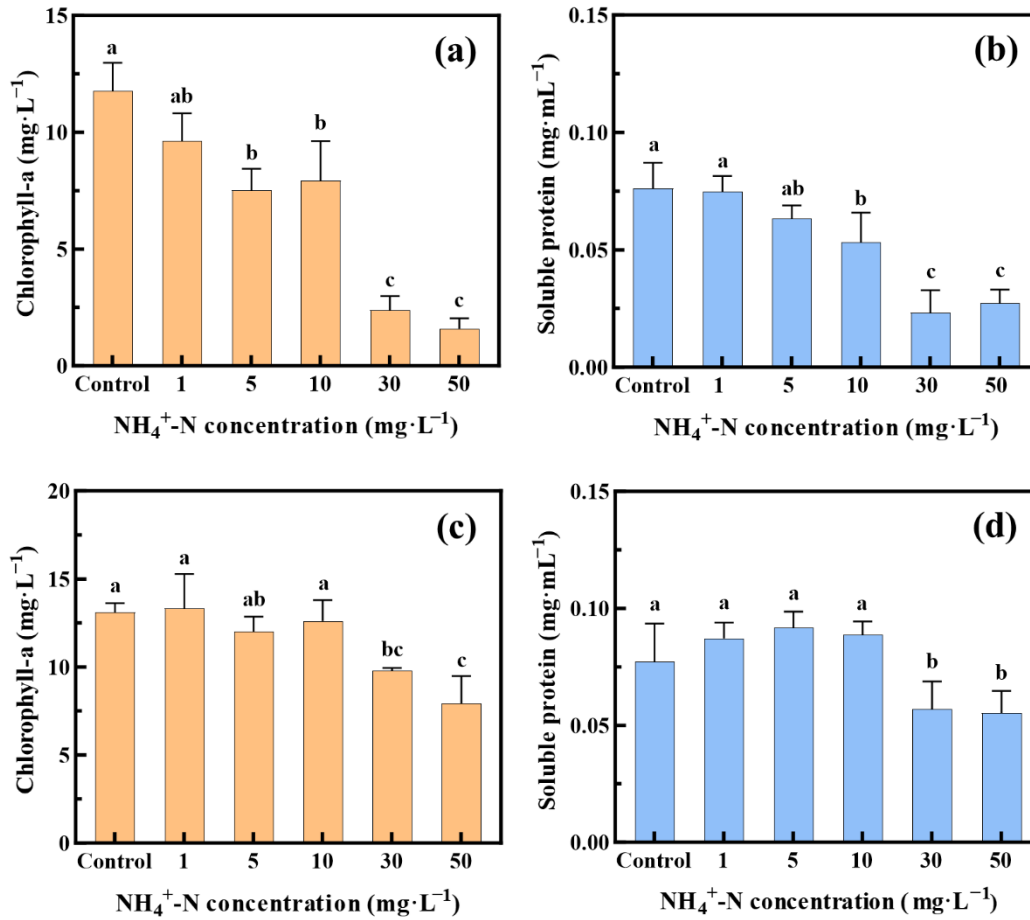

**Figure S7.** Variations in chlorophyll-a and soluble protein contents within *Oocystis lacustris* cells at different  $\text{NH}_4^+\text{-N}$  concentrations on the 8th day - September 2022. **(a,b)** Changes in chlorophyll-a and soluble protein contents within algal cells in the EX phase; **(c,d)** changes in chlorophyll-a and soluble protein contents within algal cells in the STA phase. (Different letters on adjacent bars indicate significant differences ( $p < 0.05$ ), while the same letter indicates no significant difference.)

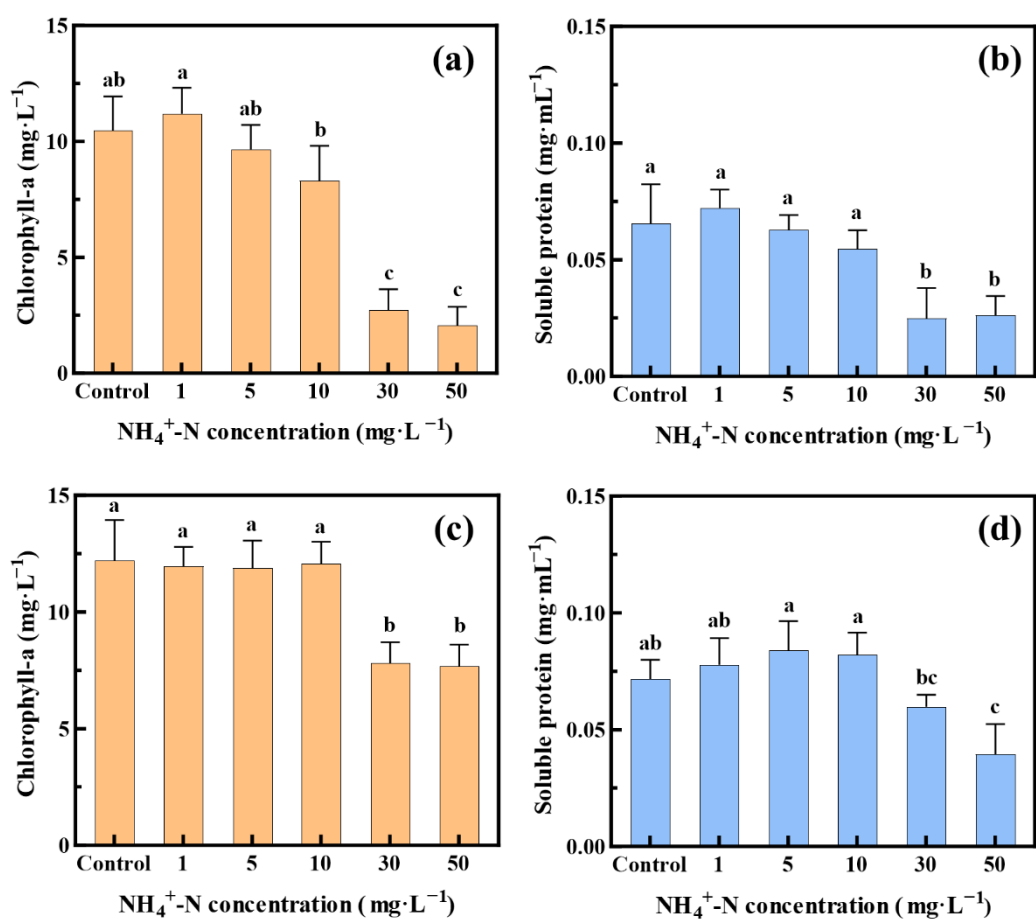

**Figure S8.** Variations in chlorophyll-a and soluble protein contents within *Oocystis lacustris* cells at different  $\text{NH}_4^+\text{-N}$  concentrations on the 8th day - November 2022. **(a,b)** Changes in chlorophyll-a and soluble protein contents within algal cells in the EX phase; **(c,d)** changes in chlorophyll-a and soluble protein contents within algal cells in the STA phase. (Different letters on adjacent bars indicate significant differences ( $p < 0.05$ ), while the same letter indicates no significant difference.)

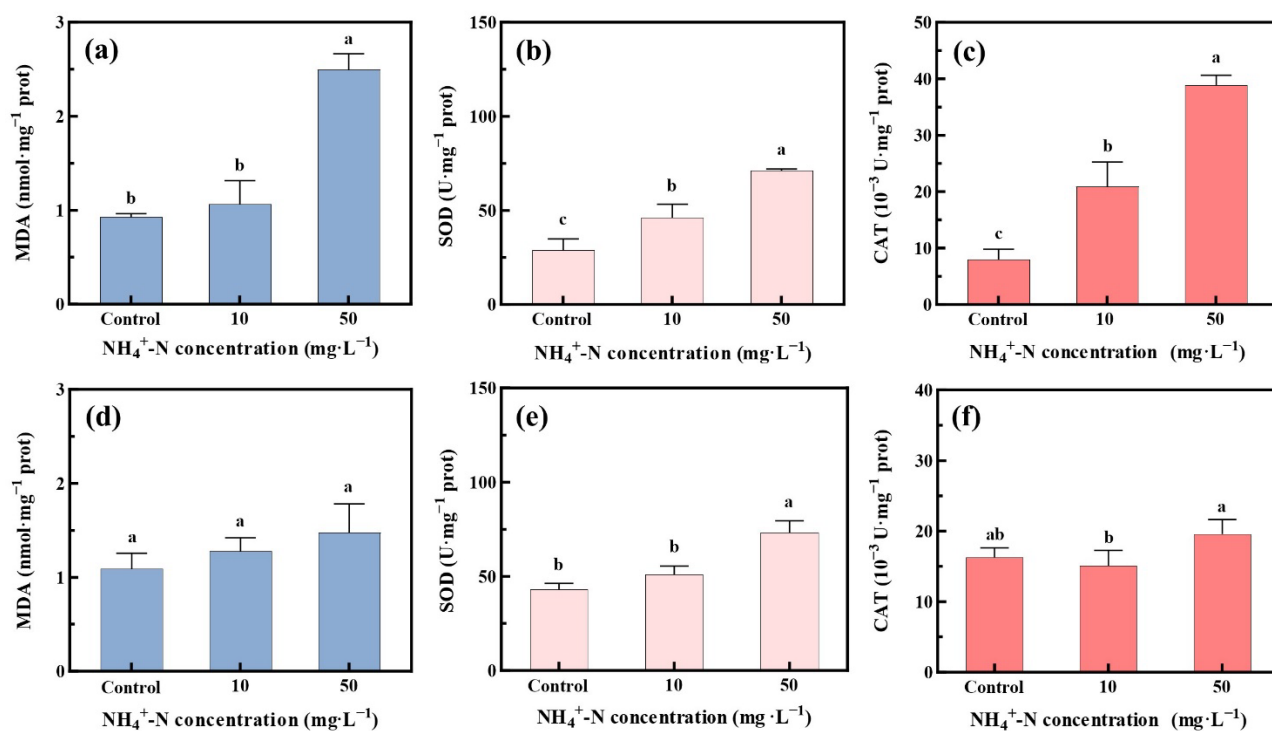

**Figure S9.** Oxidative stress status within *Oocystis lacustris* cells treated with different concentrations of  $\text{NH}_4^+\text{-N}$  on the 8th day - September 2022. **(a–c)** MDA concentration and SOD and CAT activities within algal cells in the EX phase; **(d–f)** MDA concentration and SOD and CAT activities within algal cells in the STA phase. (Different letters on adjacent bars indicate significant differences ( $p < 0.05$ ), while the same letter indicates no significant difference.)

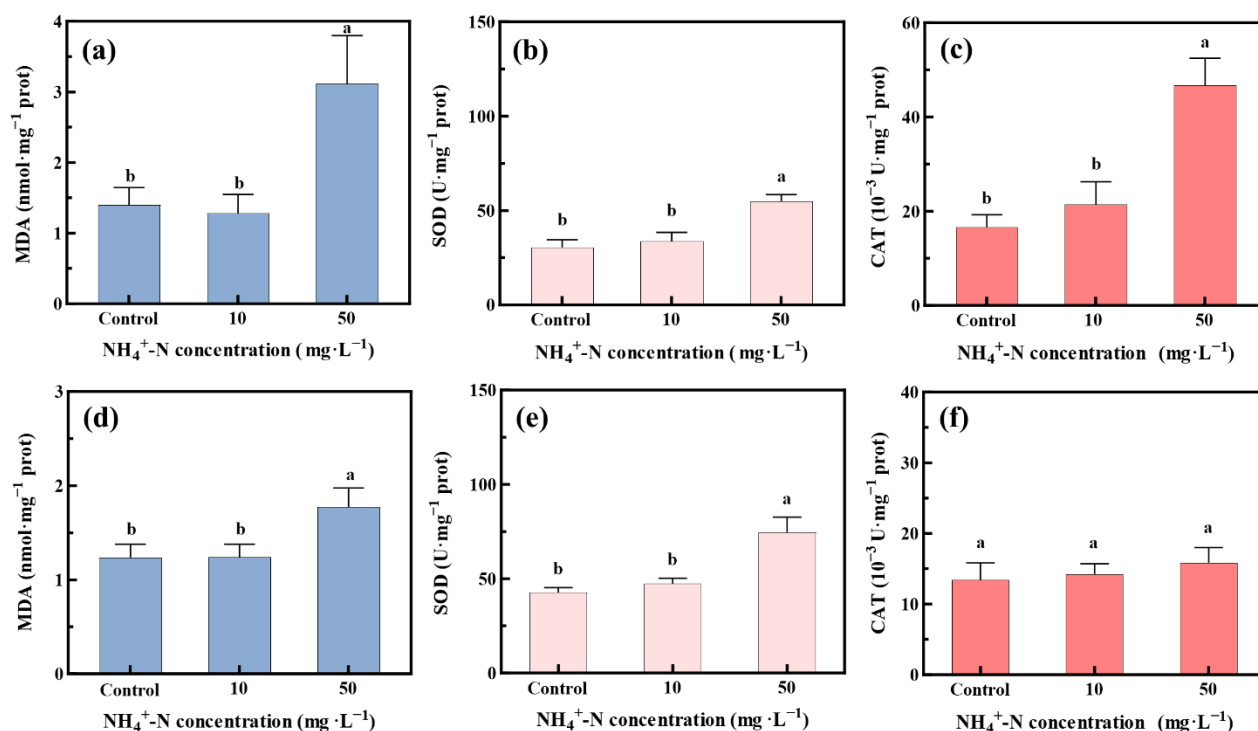

**Figure S10.** Oxidative stress status within *Oocystis lacustris* cells treated with different concentrations of  $\text{NH}_4^+\text{-N}$  on the 8th day - November 2022. (a–c) MDA concentration and SOD and CAT activities within algal cells in the EX phase; (d–f) MDA concentration and SOD and CAT activities within algal cells in the STA phase. (Different letters on adjacent bars indicate significant differences ( $p < 0.05$ ), while the same letter indicates no significant difference.)



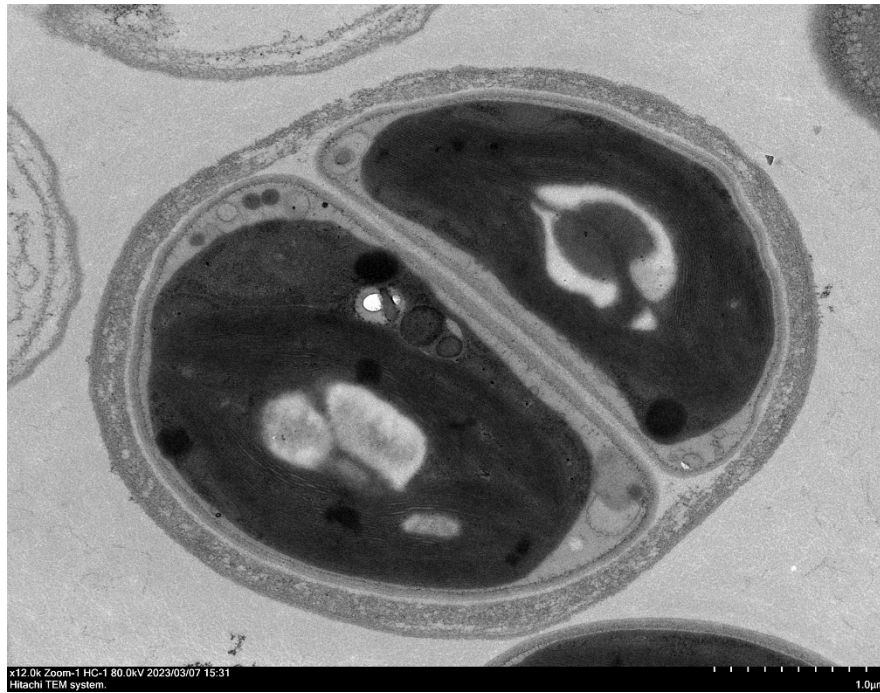

**Figure S11.** Microscopic morphology of *Oocystis lacustris* cells in the EX phase on the 8th day: Two cells enveloped in a pectinaceous gelatinous sheath of control group.

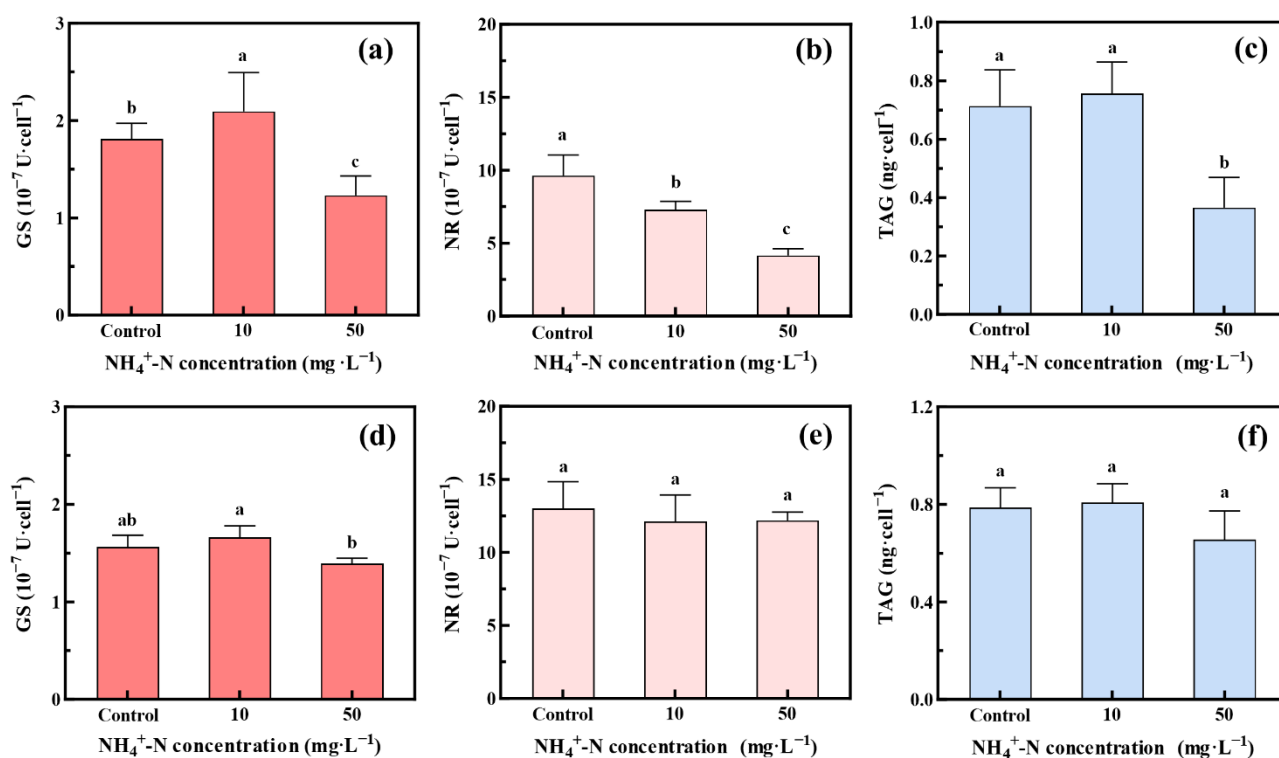

**Figure S12.** Changes in nitrogen metabolism enzymes and TAG activity within *Oocystis lacustris* treated by different  $\text{NH}_4^+\text{-N}$  concentrations - September 2022: (a) GS, (b) NR, and (c) TAG within algal cells in the EX phase; (d) GS, (e) NR, and (f) TAG within algal cells in the STA phase. (Different letters on adjacent bars indicate significant differences ( $p < 0.05$ ), while the same letter indicates no significant difference.)

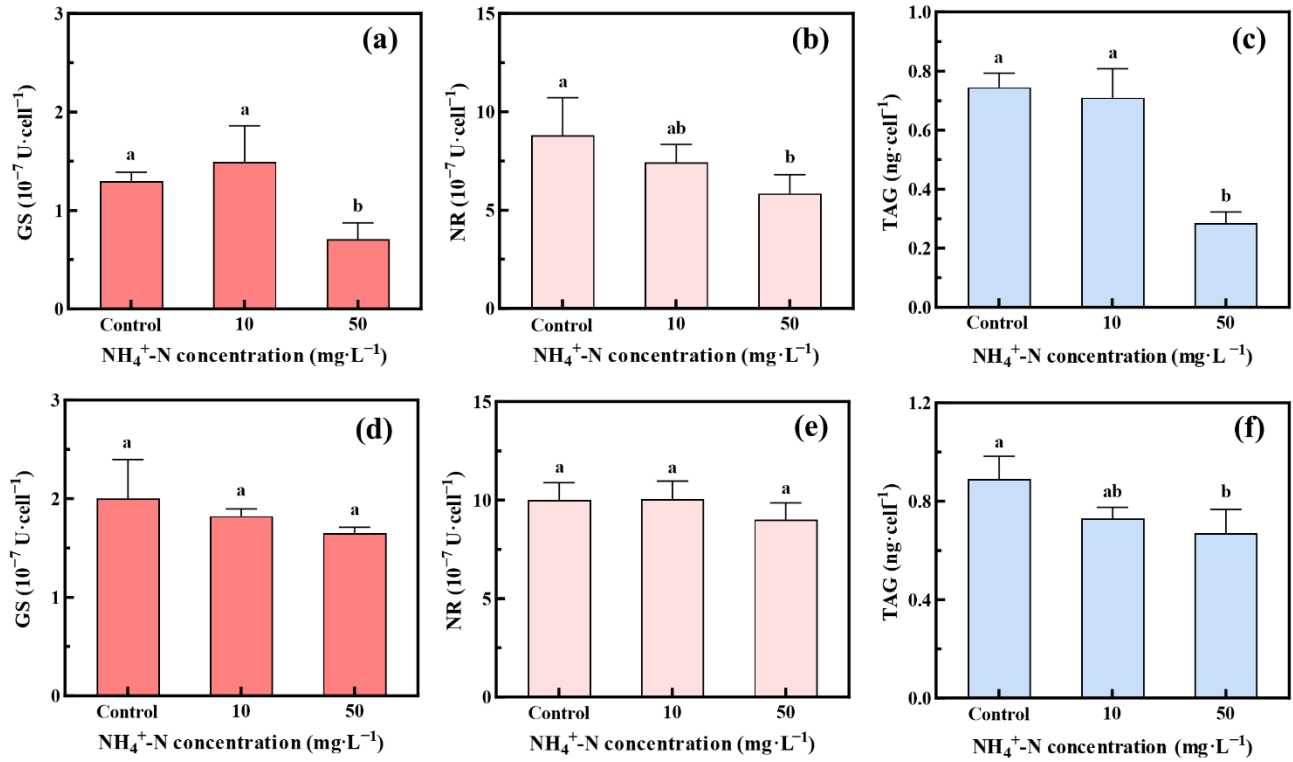

**Figure S13.** Changes in nitrogen metabolism enzymes and TAG activity within *Oocystis lacustris* treated by different  $\text{NH}_4^+\text{-N}$  concentrations - November 2022: (a) GS, (b) NR, and (c) TAG within algal cells in the EX phase; (d) GS, (e) NR, and (f) TAG within algal cells in the STA phase. (Different letters on adjacent bars indicate significant differences ( $p < 0.05$ ), while the same letter indicates no significant difference.)
